# Supplementary material
Source: PubMed Central journal article supplement (PMC3064228)
Supplement: supp_M110.162214_jbc.M110.162214-1.pdf [file supp_M110.162214_jbc.M110.162214-1.pdf]

## Supplemental Figure Legends

**FIGURE S1. Alignment of chicken erythrocyte  $\beta$ VI tubulin (C $\beta$ VI) sequence with major bovine brain  $\beta$ II tubulin (B $\beta$ II) and major human  $\beta$ I tubulin (H $\beta$ I) sequences.** All sequence divergences are highlighted in grey. Sequence differences that result in most significant changes in amino acid side chain are marked with an asterisk. Secondary structure designations are shown below the alignment, with Sn representing  $\beta$ -sheets and Hn representing  $\alpha$ -helices. The positions of loops T1-T7, which are involved in nucleotide binding, are indicated. The H1-S2 and the M-loops, which form lateral contacts between MT protofilaments, are also labeled.

**FIGURE S2. Representative mass spectra of isobaric  $\alpha$ - and  $\beta$ -tubulin peptides.** Sequence coverage was determined based on FT-MS data with a mass accuracy threshold of  $\leq 2$  ppm. Isobaric peptides, those whose masses are identical, but whose sequences differ, were identified by MS/MS analysis. Shown here are representative LTQ-MS (I), MS/MS (II), FT-MS at 0 min HDX (III), and FT-MS at 30 min HDX in the presence of peloruside A (IV) for one  $\alpha$ -tubulin peptide,  $\alpha$ 287-294 (a), and one  $\beta$ -tubulin peptide,  $\beta$ 341-353 (b).

**FIGURE S3. Map of peptides for chicken erythrocyte  $\alpha$ -tubulin (grey, UniProt P02552 fragment) and  $\beta$ -tubulin (black, UniProt P09207) obtained from a peptic digest.** Each line represents a unique peptide identified from a combination of ProteinProspector MSNonSpecific search with mass error threshold of  $< 2.0$  ppm and subsequent MS/MS analysis of the isobaric peaks. Only those peptides that remained detectable after deuterium incorporation are included in the map: 30  $\alpha$ -tubulin peptides (74% sequence coverage) and 24  $\beta$ -tubulin peptides (73% sequence coverage).

**FIGURE S4. Representative Gaussian fits for the determination of the centroid mass values.** The centroid  $m/z$  value ( $x_c$ ) for each

peptide was determined from a Gaussian curve fit to the corresponding isotopic peak distribution using OriginPro 8. Shown here are the Gaussian fits for an  $\alpha$ -tubulin peptide,  $\alpha$ 287-294 (H9). Note a distinct shift to the left of the centroid value in the peloruside A sample (b) as compared to control (a), indicating a reduction in mass associated with decreased deuterium incorporation in response to drug binding.

**FIGURE S5. FT-MS spectra of the drugs extracted from the bovine brain and chicken erythrocyte MT pellets.** Epothilone B (a), peloruside A (b), and laulimalide (c) were extracted from the Taxol-MT pellets as described in Experimental Procedures. Briefly, BBT or CET was polymerized in the presence of GTP, equimolar Taxol and equimolar epothilone B, peloruside A, or laulimalide. The supernatant was removed, the pellet was resuspended in 0.1 M MEM buffer, and the drugs were extracted with  $\text{CH}_2\text{Cl}_2$  three times. The organic layers were combined, dried overnight, and resuspended in 70% (v/v) methanol. Drug content was determined by mass spectrometry using direct infusion into a 12-T Varian IonSpec FT-ICR MS (Varian Inc.) The peaks corresponding to the detected drugs are highlighted in bold and labeled with drug names (Tx, EpoB, PelA, or LML) and appropriate mass designations.

**FIGURE S6. Effect of F270V mutation on epothilone binding energy (a) and pose (b).** Table in (a) lists the average computed  $\Delta G_{\text{bind}}$  for the taxane site of epothilone B and ixabepilone, obtained for wild type CET and the F270V mutant. In (b), the  $\beta$ -tubulin components of the taxane site are shown in gray, and the secondary structure designations are labeled according to Löwe *et al.* (6). The epothilone B pose is shown as dark blue sticks in the WT CET, while that shown as light blue sticks is the pose in the F270V mutant. Phe270 is shown in green.

**Table S1.** Non-redundant peptides of  $\alpha$ - and  $\beta$ -tubulin identified by ProteinProspector prior to H/D exchange. The mass error threshold was set at 2 ppm, and the actual error for each peptide is reported in the “Delta ppm” column.

| Submitted              | MH <sup>+</sup> |           | Delta ppm | Start | End | Sequence                          | RT (min) |     |
|------------------------|-----------------|-----------|-----------|-------|-----|-----------------------------------|----------|-----|
|                        | Equivalent      | Matched   |           |       |     |                                   | START    | END |
| <b>Alpha Tubulin</b>   |                 |           |           |       |     |                                   |          |     |
| 737.3498               | 737.3498        | 737.3498  | -0.0221   | 377   | 383 | (C) MLSNTTA (I)                   | 1.5      | 2   |
| 640.2437 <sup>*2</sup> | 1279.4801       | 1279.4808 | -0.549    | 439   | 450 | (D) SVEGEGEEGEE (I)               | 2        | 2.5 |
| 657.3669               | 657.3669        | 657.3678  | -1.44     | 173   | 178 | (Y) PARQVS (T)                    | 2        | 2.5 |
| 631.3308 <sup>*2</sup> | 1261.6543       | 1261.6535 | 0.632     | 319   | 329 | (L) YRGDVPKDVN(A)                 | 2.5      | 3   |
| 503.2702 <sup>*2</sup> | 1005.5331       | 1005.5332 | -0.0931   | 369   | 377 | (L) AKVQRAVCM(L)                  | 2.5      | 3   |
| 1005.5326              | 1005.5326       | 1005.5332 | -0.614    | 369   | 377 | (L) AKVQRAVCM(L)                  | 2.5      | 3   |
| 738.3269               | 738.3269        | 738.3273  | -0.551    | 1     | 6   | (T) MRECIS(V)                     | 2.5      | 3   |
| 500.2560 <sup>*2</sup> | 999.5047        | 999.504   | 0.698     | 2     | 10  | (M) RECISVHVG(Q)                  | 3.5      | 4   |
| 808.3292               | 808.3292        | 808.3294  | -0.266    | 295   | 301 | (A) CFEPANQ(M)                    | 4.5      | 5   |
| 619.3665               | 619.3665        | 619.3661  | 0.616     | 234   | 239 | (Q) IVSSIT(A)                     | 5.5      | 6   |
| 819.8729 <sup>*2</sup> | 1638.7385       | 1638.7372 | 0.835     | 302   | 315 | (Q) MVKCDPRHGKYM(C)               | 6        | 6.5 |
| 728.3895 <sup>*2</sup> | 1455.7717       | 1455.7703 | 0.986     | 53    | 66  | (F) FSETGAGKHVPR(V)               | 6        | 6.5 |
| 723.3903 <sup>*2</sup> | 1445.7733       | 1445.7747 | -0.955    | 318   | 330 | (L) LYRGDVPKDVNA(A)               | 6        | 6.5 |
| 687.8722 <sup>*2</sup> | 1374.7371       | 1374.7376 | -0.34     | 318   | 329 | (L) LYRGDVPKDVN(A)                | 6        | 6.5 |
| 666.8490 <sup>*2</sup> | 1332.6907       | 1332.6906 | 0.0624    | 319   | 330 | (L) YRGDVPKDVNA(A)                | 6        | 6.5 |
| 581.2529 <sup>*3</sup> | 1741.7441       | 1741.7463 | -1.26     | 302   | 316 | (Q) MVKCDPRHGKYM(C)               | 6        | 6.5 |
| 560.8454 <sup>*2</sup> | 1120.6835       | 1120.6837 | -0.161    | 336   | 344 | (I) KTKRTIQ(V)                    | 6        | 6.5 |
| 546.9168 <sup>*3</sup> | 1638.7358       | 1638.7372 | -0.798    | 302   | 315 | (Q) MVKCDPRHGKYM(C)               | 6        | 6.5 |
| 990.5103               | 990.5103        | 990.5102  | 0.0844    | 378   | 387 | (M) LSNNTAIAEA(W)                 | 6        | 6.5 |
| 804.4089               | 804.4089        | 804.4098  | -1.09     | 287   | 294 | (L) SVAEITNA(C)                   | 6        | 6.5 |
| 690.3302               | 690.3302        | 690.3305  | -0.378    | 249   | 254 | (L) NVDLTE(F)                     | 6        | 6.5 |
| 690.3309               | 690.3309        | 690.3305  | 0.636     | 249   | 254 | (L) NVDLTE(F)                     | 6.5      | 7   |
| 801.9215 <sup>*2</sup> | 1602.8357       | 1602.8387 | -1.86     | 53    | 67  | (F) FSETGAGKHVPR(V)               | 7        | 7.5 |
| 731.8156 <sup>*2</sup> | 1462.6239       | 1462.6267 | -1.91     | 190   | 202 | (L) THTTLEHSDCAF(M)               | 7        | 7.5 |
| 700.8745 <sup>*2</sup> | 1400.7417       | 1400.742  | -0.203    | 158   | 169 | (L) SVDYGKSKLEF(S)                | 7        | 7.5 |
| 577.9686 <sup>*3</sup> | 1731.8912       | 1731.8925 | -0.74     | 78    | 91  | (E) VRTGTYRQLFHPEQ(L)             | 7        | 7.5 |
| 534.9509 <sup>*3</sup> | 1602.8381       | 1602.8387 | -0.346    | 53    | 67  | (F) FSETGAGKHVPR(V)               | 7        | 7.5 |
| 678.3564               | 678.3564        | 678.357   | -0.812    | 243   | 248 | (L) RFDGAL(N)                     | 7        | 7.5 |
| 921.4766 <sup>*3</sup> | 2762.4152       | 2762.4108 | 1.62      | 92    | 116 | (Q) LITGKEDAANNYARGHYTIGKEID(L)   | 8        | 8.5 |
| 837.4420 <sup>*2</sup> | 1673.8767       | 1673.8752 | 0.932     | 120   | 134 | (L) DRIRKLADQCTGLQG(F)            | 8        | 8.5 |
| 587.6518 <sup>*3</sup> | 1760.9408       | 1760.9402 | 0.364     | 214   | 227 | (C) RRNLDIRPTYTNL(N)              | 8        | 8.5 |
| 719.3407 <sup>*2</sup> | 1437.6741       | 1437.6744 | -0.179    | 426   | 438 | (M) AALEKDYEEVGV(D)               | 8.5      | 9   |
| 691.3577 <sup>*4</sup> | 2762.409        | 2762.4108 | -0.656    | 92    | 116 | (Q) LITGKEDAANNYARGHYTIGKEID(L)   | 8.5      | 9   |
| 644.0088 <sup>*3</sup> | 1930.0118       | 1930.0103 | 0.822     | 154   | 169 | (L) MERLSVDYGKSKLEF(S)            | 8.5      | 9   |
| 589.3175 <sup>*2</sup> | 1177.6277       | 1177.6265 | 1.02      | 400   | 408 | (Y) AKRAFVHWY(V)                  | 8.5      | 9   |
| 859.9414 <sup>*2</sup> | 1718.8755       | 1718.8748 | 0.414     | 272   | 286 | (T) YAPVISAEEKAYHEQL(S)           | 9        | 9.5 |
| 740.8804 <sup>*4</sup> | 2960.4998       | 2960.5056 | -1.96     | 307   | 333 | (D) PRHGKYM(C)LLYRGDVPKDVNA(A)(T) | 9        | 9.5 |

|                        |           |           |        |     |     |                                                |      |      |
|------------------------|-----------|-----------|--------|-----|-----|------------------------------------------------|------|------|
| 615.6646 <sup>+3</sup> | 1844.9792 | 1844.9766 | 1.44   | 78  | 92  | (E) VRTGTYRQLFHPEQL(I)                         | 9    | 9.5  |
| 573.6303 <sup>+3</sup> | 1718.8763 | 1718.8748 | 0.893  | 272 | 286 | (T) YAPVISA EKAYHEQL(S)                        | 9    | 9.5  |
| 720.0057 <sup>+3</sup> | 2158.0025 | 2158.0056 | -1.41  | 201 | 218 | (C) AFMVDNEAIYDICRRNLD(I)                      | 9.5  | 10   |
| 665.8482 <sup>+2</sup> | 1330.6891 | 1330.6902 | -0.844 | 83  | 92  | (T) YRQLFHPEQL(I)                              | 9.5  | 10   |
| 659.3416 <sup>+3</sup> | 1976.0102 | 1976.0124 | -1.07  | 272 | 289 | (T) YAPVISA EKAYHEQLSVA(E)                     | 9.5  | 10   |
| 656.3010 <sup>+2</sup> | 1311.5947 | 1311.5964 | -1.28  | 139 | 152 | (F) HSFGGGTSGFTSL(L)                           | 9.5  | 10   |
| 540.2561 <sup>+4</sup> | 2158.0026 | 2158.0056 | -1.4   | 201 | 218 | (C) AFMVDNEAIYDICRRNLD(I)                      | 9.5  | 10   |
| 1129.5602              | 1129.5602 | 1129.5623 | -1.87  | 68  | 77  | (F) VDLEPTVIDE(V)                              | 9.5  | 10   |
| 589.2985               | 589.2985  | 589.298   | 0.783  | 384 | 388 | (A) IAEAW(A)                                   | 9.5  | 10   |
| 877.4775 <sup>+2</sup> | 1753.9477 | 1753.9483 | -0.335 | 352 | 368 | (F) KVGINYQPPTVVGDDL(A)                        | 10   | 10.5 |
| 629.3473 <sup>+3</sup> | 1886.0273 | 1886.0276 | -0.156 | 118 | 134 | (L) VLDRIRKLADQCTGLQG(F)                       | 10   | 10.5 |
| 834.3808 <sup>+3</sup> | 2501.1278 | 2501.1249 | 1.17   | 26  | 49  | (C) LEHQIQPDGQMPDKTIGGGDSF(N)                  | 11   | 11.5 |
| 880.9738 <sup>+2</sup> | 1760.9403 | 1760.9402 | 0.0665 | 214 | 227 | (C) RRNLDIERPTYTNL(N)                          | 11.5 | 12   |
| 672.0342 <sup>+3</sup> | 2014.088  | 2014.0909 | -1.41  | 255 | 271 | (E) FQTNLVPYPRHFHPLAT(Y)                       | 11.5 | 12   |
| 1033.5546              | 1033.5546 | 1033.5564 | -1.78  | 181 | 189 | (A) VVEPYNLSIL(T)                              | 11.5 | 12   |
| 705.8981 <sup>+2</sup> | 1410.7889 | 1410.7892 | -0.219 | 260 | 271 | (L) VYPRHFHPLAT(Y)                             | 12   | 12.5 |
| 623.0124 <sup>+3</sup> | 1867.0226 | 1867.0225 | 0.0897 | 256 | 271 | (F) QTNLVPYPRHFHPLAT(Y)                        | 12   | 12.5 |
| 615.3356 <sup>+3</sup> | 1843.9922 | 1843.9912 | 0.547  | 173 | 189 | (Y) PARQVSTAVVEPYNLSIL(T)                      | 12   | 12.5 |
| 924.3915               | 924.3915  | 924.392   | -0.558 | 344 | 351 | (F) VDWCP TGF(K)                               | 12   | 12.5 |
| 934.0164 <sup>+2</sup> | 1867.0255 | 1867.0225 | 1.63   | 256 | 271 | (F) QTNLVPYPRHFHPLAT(Y)                        | 12.5 | 13   |
| 650.8833 <sup>+2</sup> | 1300.7593 | 1300.7583 | 0.767  | 228 | 239 | (L) NRLIGQIVSSIT(A)                            | 13.5 | 14   |
| 835.9128 <sup>+2</sup> | 1670.8183 | 1670.8173 | 0.614  | 137 | 153 | (S) VFHSGGGTSGFTSLL(M)                         | 14.5 | 15   |
| 903.2605 <sup>+5</sup> | 4512.2734 | 4512.2679 | 1.23   | 371 | 408 | (K) VQRAVCMLSNTTAAIEAWARLDHKFDLMYAKRAFHWHWY(V) | 15   | 15.5 |
| 775.4319 <sup>+2</sup> | 1549.8565 | 1549.8584 | -1.23  | 234 | 248 | (Q) IVSSITASLRFDGAL(N)                         | 15   | 15.5 |
| 726.6667 <sup>+4</sup> | 2903.645  | 2903.6465 | -0.54  | 319 | 344 | (L) YRGDVPKDVNAAIATIKRTIQFV(D)                 | 15.5 | 16   |

### Beta Tubulin

|                        |           |           |         |     |     |                        |     |     |
|------------------------|-----------|-----------|---------|-----|-----|------------------------|-----|-----|
| 834.4091 <sup>+2</sup> | 1667.8109 | 1667.8098 | 0.692   | 158 | 171 | (E) EYPDRIMNTFSVVP (S) | 0   | 0.5 |
| 691.8018 <sup>+2</sup> | 1382.5963 | 1382.5958 | 0.381   | 435 | 446 | (E) YEEAEASPEKET (M)   | 0.5 | 1   |
| 967.5133               | 967.5133  | 967.5142  | -0.926  | 316 | 323 | (C) IFRGRMST(R)        | 2.5 | 3   |
| 484.2607 <sup>+2</sup> | 967.5141  | 967.5142  | -0.0752 | 316 | 323 | (C) IFRGRMST(R)        | 2.5 | 3   |
| 808.3437               | 808.3437  | 808.344   | -0.395  | 295 | 301 | (F) DARNMMA(A)         | 5   | 5.5 |
| 959.4786               | 959.4786  | 959.4793  | -0.678  | 369 | 377 | (I) GNNTAIQEL(F)       | 5   | 5.5 |
| 1126.5754              | 1126.5754 | 1126.5739 | 1.35    | 331 | 340 | (L) LSVQTKNSSF(F)      | 5.5 | 6   |
| 563.7915 <sup>+2</sup> | 1126.5757 | 1126.5739 | 1.64    | 331 | 340 | (L) LSVQTKNSSF(F)      | 5.5 | 6   |
| 493.2605 <sup>+3</sup> | 1477.7669 | 1477.7692 | -1.55   | 301 | 313 | (M) AACDPRRGRYLT(A)    | 6   | 6.5 |
| 739.3887 <sup>+2</sup> | 1477.7701 | 1477.7692 | 0.597   | 301 | 313 | (M) AACDPRRGRYLT(A)    | 6   | 6.5 |
| 888.4413               | 888.4413  | 888.4421  | -0.942  | 324 | 330 | (T) REVDEQL(L)         | 6   | 6.5 |
| 870.3785 <sup>+2</sup> | 1739.7497 | 1739.7494 | 0.188   | 432 | 446 | (D) VEEYEEAEASPEKET(M) | 6   | 6.5 |
| 720.3227               | 720.3227  | 720.3233  | -0.787  | 113 | 118 | (L) IENVMD(V)          | 6.5 | 7   |
| 631.3284 <sup>+3</sup> | 1891.9706 | 1891.9695 | 0.629   | 152 | 166 | (L) INKIREEYDPRIMNT(F) | 6.5 | 7   |
| 946.4889 <sup>+2</sup> | 1891.9705 | 1891.9695 | 0.563   | 152 | 166 | (L) INKIREEYDPRIMNT(F) | 6.5 | 7   |
| 674.336                | 674.336   | 674.3355  | 0.673   | 202 | 207 | (C) IDNEAL(Y)          | 6.5 | 7   |

|                         |           |           |         |     |     |                                              |      |      |
|-------------------------|-----------|-----------|---------|-----|-----|----------------------------------------------|------|------|
| 516.9407 <sup>+3</sup>  | 1548.8075 | 1548.8064 | 0.769   | 301 | 314 | (M) AACDPRRGRYLTV(A)(C)                      | 6.5  | 7    |
| 535.7657 <sup>+2</sup>  | 1070.5241 | 1070.5234 | 0.694   | 315 | 323 | (A) CIFRGRMST(R)                             | 6.5  | 7    |
| 807.3994                | 807.3994  | 807.3995  | -0.178  | 364 | 371 | (M) AATFIGNN(T)                              | 6.5  | 7    |
| 559.6294 <sup>+3</sup>  | 1676.8736 | 1676.8755 | -1.09   | 52  | 65  | (F) NEAYSHKYVPR(S)(V)                        | 7    | 7.5  |
| 777.3446                | 777.3446  | 777.3447  | -0.168  | 201 | 207 | (F) CIDNEAL(Y)                               | 7    | 7.5  |
| 756.3279 <sup>+2</sup>  | 1511.6485 | 1511.6496 | -0.727  | 408 | 421 | (E) FSEAEGNTNDLVSE(Y)                        | 8    | 8.5  |
| 861.4017                | 861.4017  | 861.4022  | -0.634  | 66  | 73  | (L) VDLEPGTM(D)                              | 8.5  | 9    |
| 700.3380 <sup>+2</sup>  | 1399.6687 | 1399.67   | -0.887  | 188 | 199 | (L) SIHQIENDET(F)                            | 8.5  | 9    |
| 647.3199 <sup>+3</sup>  | 1939.9451 | 1939.9477 | -1.3    | 315 | 330 | (A) CIFRGRMSTREVDEQL(L)                      | 8.5  | 9    |
| 637.3245 <sup>+2</sup>  | 1273.6417 | 1273.6423 | -0.447  | 331 | 341 | (L) LSVQTKNSSYF(V)                           | 8.5  | 9    |
| 663.0082 <sup>+3</sup>  | 1987.01   | 1987.0072 | 1.42    | 50  | 65  | (V) YFNEAYSHKYVPR(S)(V)                      | 9    | 9.5  |
| 609.3291 <sup>+3</sup>  | 1825.9727 | 1825.9741 | -0.768  | 4   | 20  | (E) IVHLQIGOCGNQIGAKF(W)                     | 10   | 10.5 |
| 650.2963 <sup>+2</sup>  | 1299.5853 | 1299.5852 | 0.116   | 21  | 31  | (F) WEVISDEHGID(I)                           | 10   | 10.5 |
| 650.3416 <sup>+4</sup>  | 2598.3446 | 2598.3463 | -0.678  | 44  | 64  | (Q) LERINVYFNEAYSHKYVPR(S)(L)                | 10   | 10.5 |
| 714.8578 <sup>+4</sup>  | 2856.4094 | 2856.4136 | -1.47   | 74  | 100 | (M) DSVRSSKIGLFRPDNFIHGNAGANN(W)             | 10   | 10.5 |
| 952.8097 <sup>+3</sup>  | 2856.4145 | 2856.4136 | 0.339   | 74  | 100 | (M) DSVRSSKIGLFRPDNFIHGNAGANN(W)             | 10   | 10.5 |
| 700.6813 <sup>+6</sup>  | 4199.0514 | 4199.0442 | 1.72    | 74  | 112 | (M) DSVRSSKIGLFRPDNFIHGNAGANNWAKGHYTEGAEL(I) | 10   | 10.5 |
| 840.6155 <sup>+5</sup>  | 4199.0484 | 4199.0442 | 1       | 74  | 112 | (M) DSVRSSKIGLFRPDNFIHGNAGANNWAKGHYTEGAEL(I) | 10   | 10.5 |
| 668.3618 <sup>+3</sup>  | 2003.0708 | 2003.0709 | -0.0196 | 212 | 228 | (C) FRTLKLTNPTYGDLNHL(V)                     | 10   | 10.5 |
| 730.3946 <sup>+3</sup>  | 2189.1692 | 2189.1713 | -0.951  | 212 | 230 | (C) FRTLKLTNPTYGDLNHLVS(L)                   | 10   | 10.5 |
| 804.4042 <sup>+2</sup>  | 1607.8011 | 1607.7999 | 0.778   | 266 | 280 | (F) FMPGFAPLTARGSQQ(Y)                       | 10   | 10.5 |
| 877.9793 <sup>+2</sup>  | 1754.9513 | 1754.9483 | 1.74    | 379 | 392 | (F) IRVSEQFSAMFRRK(A)                        | 11   | 11.5 |
| 565.2962 <sup>+2</sup>  | 1129.5851 | 1129.5856 | -0.463  | 354 | 363 | (V) CDIPPRGLKM(A)                            | 11.5 | 12   |
| 660.2702                | 660.2702  | 660.2698  | 0.644   | 208 | 212 | (L) YDICF(R)                                 | 12   | 12.5 |
| 874.9364 <sup>+2</sup>  | 1748.8655 | 1748.8636 | 1.1     | 284 | 298 | (A) LSVPELTQQMFDARN(M)                       | 12   | 12.5 |
| 684.3885 <sup>+2</sup>  | 1367.7697 | 1367.7682 | 1.14    | 342 | 353 | (F) VEWIPNNVKVAV(C)                          | 12   | 12.5 |
| 577.2343 <sup>+2</sup>  | 1153.4613 | 1153.4612 | 0.0776  | 119 | 128 | (D) VVRNECESCD(C)                            | 13   | 13.5 |
| 535.2185                | 535.2185  | 535.2181  | 0.796   | 128 | 132 | (C) DCLQG (F)                                | 13   | 13.5 |
| 785.9170 <sup>+2</sup>  | 1570.8267 | 1570.8258 | 0.617   | 136 | 152 | (L) IHSLGGGTGSGMGTLL(N)                      | 13   | 13.5 |
| 923.4812 <sup>+2</sup>  | 1845.9551 | 1845.9568 | -0.891  | 341 | 356 | (Y) FVEWIPNNVKVAVCDI(P)                      | 13   | 13.5 |
| 662.3221 <sup>+2</sup>  | 1323.6369 | 1323.6362 | 0.575   | 32  | 44  | (D) IAGNYCGNASLQL(E)                         | 13.5 | 14   |
| 866.9365 <sup>+2</sup>  | 1732.8657 | 1732.8687 | -1.71   | 133 | 150 | (G) FQLIHSLGGGTGSGMGTLL(L)                   | 13.5 | 14   |
| 552.0039 <sup>+3</sup>  | 1653.9971 | 1653.9985 | -0.826  | 250 | 263 | (D) LRKLAVNMVFPRL(H)                         | 13.5 | 14   |
| 646.7147 <sup>+3</sup>  | 1938.1295 | 1938.1258 | 1.91    | 250 | 265 | (D) LRKLAVNMVFPRLHF(F)                       | 13.5 | 14   |
| 609.0190 <sup>+3</sup>  | 1825.0424 | 1825.0418 | 0.368   | 251 | 265 | (L) RKLAVNMVFPRLHF(F)                        | 13.5 | 14   |
| 768.3982 <sup>+2</sup>  | 1535.7891 | 1535.7886 | 0.315   | 281 | 293 | (Q) YRALSVELTQQM(F)                          | 13.5 | 14   |
| 1057.5707 <sup>+2</sup> | 2114.1341 | 2114.138  | -1.82   | 168 | 187 | (F) SWPSPKVSdTWEYPNAIL(S)                    | 14.5 | 15   |
| 757.9226 <sup>+2</sup>  | 1514.8379 | 1514.8366 | 0.889   | 341 | 353 | (Y) FVEWIPNNVKVAV(C)                         | 14.5 | 15   |
| 650.3415 <sup>+4</sup>  | 2598.3442 | 2598.3463 | -0.832  | 44  | 64  | (Q) LERINVYFNEAYSHKYVPR(S)(L)                | 15   | 15.5 |
| 866.7866 <sup>+3</sup>  | 2598.3452 | 2598.3463 | -0.418  | 44  | 64  | (Q) LERINVYFNEAYSHKYVPR(S)(L)                | 15   | 15.5 |
| 854.4601 <sup>+2</sup>  | 1707.9129 | 1707.9098 | 1.82    | 231 | 246 | (S) LTMMSGVTTSLRFFGQL(N)                     | 15   | 15.5 |
| 657.8288 <sup>+2</sup>  | 1314.6503 | 1314.6511 | -0.578  | 378 | 388 | (L) FIRVSEQFSAM(F)                           | 15   | 15.5 |

**Table S2.** Drug-induced average  $\Delta$ HDX for each detected peptide in  $\alpha$ - and  $\beta$ -tubulin, with corresponding standard deviations, and P-values.

| Alpha Tubulin |                                                |              |          |          |              |          |         |              |          |         |              |          |         |
|---------------|------------------------------------------------|--------------|----------|----------|--------------|----------|---------|--------------|----------|---------|--------------|----------|---------|
| Peptide       | Sequence                                       | Ixabepilone  |          |          | Epothilone B |          |         | Peloruside A |          |         | Laulimalide  |          |         |
|               |                                                | $\Delta$ HDX | $\sigma$ | P-value* | $\Delta$ HDX | $\sigma$ | P-value | $\Delta$ HDX | $\sigma$ | P-value | $\Delta$ HDX | $\sigma$ | P-value |
| 26-49         | (C) LEHGIQPDGQMPDKITGGGDDSF(N)                 | -168.01      | 59.82    | 0.190    | -1051.6      | 93.56    | 0.001   | -412.61      | 301.5    | 0.110   | -521.6       | 162.77   | 0.019   |
| 53-66         | (F) FSETGAGKHVPRAV(F)                          | -409.67      | 67.36    | 0.005    | -646.16      | 48.15    | 0.002   | -734.06      | 60.38    | 0.001   | -574.11      | 120.21   | 0.017   |
| 68-77         | (F) VDLEPTVIDE(V)                              | -53.05       | 26.76    | 0.150    | -637.73      | 28.46    | 0.000   | 21.72        | 233.96   | 0.900   | -20.37       | 21.28    | 0.690   |
| 78-91         | (E) VRTGTYRQLFHPEQL(L)                         | -230.82      | 41.61    | 0.004    | -566.4       | 117.09   | 0.001   | -653.12      | 15.2     | 0.000   | -798.39      | 41.13    | 0.000   |
| 92-116        | (Q) LITGKEDAANNYARGHYTIGKEIID(L)               | -321.81      | 190.03   | 0.120    | -959.35      | 143.07   | 0.000   | -680.16      | 41.9     | 0.001   | -706.32      | 496.84   | 0.090   |
| 120-134       | (L) DRIRKLDQCTGLQG(F)                          | -515.32      | 94.34    | 0.001    | -377.34      | 41.84    | 0.001   | -357.71      | 166.24   | 0.026   | -618.18      | 59.51    | 0.000   |
| 137-153       | (S) VFHSFGGKGTSGFTSLL(M)                       | -596.17      | 34.14    | 0.003    | -705.08      | 84.69    | 0.009   | -772.74      | 17.42    | 0.003   | -694.69      | 90.42    | 0.003   |
| 154-169       | (L) MERLSVDYDGKSKLEF(S)                        | -499.87      | 78.02    | 0.014    | -501.52      | 62.21    | 0.002   | -390.48      | 75.09    | 0.011   | -574.77      | 71.72    | 0.002   |
| 181-189       | (A) VVEPYNSIL(T)                               | -113.03      | 41.58    | 0.051    | -36.72       | 35.76    | 0.610   | 205.15       | 19.67    | 0.011   | 235.76       | 25.2     | 0.008   |
| 190-202       | (L) THTTLEHSDCAF(M)                            | -996.79      | 125.61   | 0.000    | -959.11      | 71.2     | 0.000   | -519.3       | 157.32   | 0.007   | -677.69      | 209.73   | 0.006   |
| 214-227       | (C) RRNLDIERPTYTNL(N)                          | -206.77      | 61.2     | 0.088    | -389.93      | 85.5     | 0.023   | -394.91      | 135.49   | 0.029   | -576.73      | 87.12    | 0.003   |
| 225-230       | (Y) TNLNRL(I)                                  | -271.45      | 30.17    | 0.003    | -208.68      | 31.72    | 0.004   | -917.07      | 39.03    | 0.000   | -835.61      | 11.89    | 0.000   |
| 234-239       | (Q) IVSSIT(A)                                  | -179.25      | 27.25    | 0.006    | -176.89      | 14.61    | 0.003   | -361.6       | 8.33     | 0.000   | -319.6       | 19.39    | 0.000   |
| 243-248       | (L) RFDGAL(N)                                  | -173.44      | 3.14     | 0.001    | -173.13      | 8.93     | 0.002   | -215.65      | 27.97    | 0.003   | -235.62      | 14.17    | 0.001   |
| 249-254       | (L) NVDLTE(F)                                  | -243.26      | 36.64    | 0.003    | -180.55      | 55.41    | 0.030   | -285.44      | 28.63    | 0.002   | -285.42      | 4.56     | 0.001   |
| 260-271       | (L) VPYPRIHFLAT(Y)                             | -166.35      | 55.79    | 0.500    | -200.99      | 39.36    | 0.960   | -186.92      | 45.93    | 0.410   | -203.33      | 79.96    | 0.270   |
| 272-289       | (T) YAPVISAEEKAYHEQLSVA(E)                     | -256.59      | 36.8     | 0.034    | -407.51      | 45.01    | 0.007   | -346.95      | 50.21    | 0.038   | -696.02      | 47.62    | 0.003   |
| 287-294       | (L) SVAEITNA(C)                                | -420.63      | 84.14    | 0.006    | -351.76      | 29.92    | 0.002   | -668.31      | 22.09    | 0.000   | -679.95      | 29.09    | 0.000   |
| 295-301       | (A) CFEPANQ(M)                                 | -235.61      | 53.59    | 0.002    | -168.1       | 38.91    | 0.010   | -454.87      | 14.05    | 0.001   | -594.34      | 81.45    | 0.002   |
| 302-315       | (Q) MVRKCDPRHGKYM(C)                           | -972.82      | 128.57   | 0.001    | -937.14      | 126.68   | 0.001   | -811.67      | 25.65    | 0.000   | -778.69      | 37.75    | 0.000   |
| 319-329       | (L) YRGDVPKDVN(A)                              | -452.91      | 115.75   | 0.006    | -474.9       | 82.42    | 0.024   | -514.5       | 111.35   | 0.008   | -463.58      | 76.51    | 0.007   |
| 319-344       | (L) YRGDVPKDVNAAIATIKTKRTIQFV(D)               | -1751.88     | 174.44   | 0.001    | -1304.8      | 154.36   | 0.002   | -1216.09     | 112.9    | 0.001   | -1764.91     | 101.49   | 0.000   |
| 336-344       | (I) KTKRTIQFV(D)                               | -51.66       | 42.05    | 0.640    | -23.49       | 54.84    | 0.820   | 88.43        | 21.79    | 0.460   | -144.11      | 42.09    | 0.310   |
| 344-351       | (F) VDWCPGTF(K)                                | -1233.56     | 66.75    | 0.000    | -974.04      | 8.34     | 0.000   | -1731.03     | 533.14   | 0.005   | -1413.82     | 337.75   | 0.003   |
| 352-368       | (F) KVGINYQPPTVVPGGDL(A)                       | -475.91      | 53.88    | 0.001    | -546.85      | 28.43    | 0.002   | -730.41      | 84.54    | 0.002   | -825.69      | 165.26   | 0.003   |
| 369-377       | (L) AKVQRAVCM(L)                               | -438.96      | 33.89    | 0.003    | -401.47      | 81.79    | 0.002   | -508.19      | 63.76    | 0.001   | -485.48      | 85.4     | 0.001   |
| 378-387       | (M) LSNTTAAIEA(W)                              | -583.18      | 11.58    | 0.002    | -587.01      | 42.61    | 0.001   | -477.32      | 60.01    | 0.001   | -551.96      | 46.75    | 0.001   |
| 400-408       | (Y) AKRAVFHWY(V)                               | -298.48      | 28.49    | 0.001    | -84.9        | 15.31    | 0.077   | 8.56         | 0.27     | 0.530   | -105.23      | 59.38    | 0.058   |
| 426-438       | (M) AALEKDYEEVGV(D)                            | -1528.2      | 179.43   | 0.006    | -1818.3      | 84.69    | 0.002   | -1595.27     | 216.86   | 0.001   | -1630.51     | 156.53   | 0.002   |
| Beta Tubulin  |                                                |              |          |          |              |          |         |              |          |         |              |          |         |
| Peptide       | Sequence                                       | Ixabepilone  |          |          | Epothilone B |          |         | Peloruside A |          |         | Laulimalide  |          |         |
|               |                                                | $\Delta$ HDX | $\sigma$ | P-value* | $\Delta$ HDX | $\sigma$ | P-value | $\Delta$ HDX | $\sigma$ | P-value | $\Delta$ HDX | $\sigma$ | P-value |
| 4-20          | (E) IVHLQIGCCNQIGAKF(W)                        | -1154.3      | 138.02   | 0.001    | -512.98      | 97.01    | 0.014   | -1026.01     | 35.50    | 0.002   | -1110.72     | 252.07   | 0.014   |
| 21-31         | (F) WEVISDEHGID(I)                             | -359.81      | 36.31    | 0.000    | -211.83      | 53.77    | 0.037   | -274.08      | 56.35    | 0.017   | -510.28      | 294.02   | 0.062   |
| 44-64         | (Q) LERINVFNEAYSHKYPRSI(L)                     | -365.83      | 42.55    | 0.001    | -299.7       | 46.35    | 0.002   | -393.4       | 89.51    | 0.007   | -697.68      | 8.08     | 0.000   |
| 52-65         | (F) NEAYSHKYPRSI(V)                            | -557.84      | 50.03    | 0.035    | -508.13      | 21.54    | 0.050   | -789.72      | 35.45    | 0.013   | -696.2       | 138.07   | 0.017   |
| 66-73         | (L) VDLEPGTM(D)                                | -36.32       | 41.13    | 0.610    | -143.45      | 68.71    | 0.039   | -260.36      | 29.43    | 0.014   | -335.2       | 49.12    | 0.003   |
| 74-100        | (M) DSVRSSKIGLFRPDNFIHGNSGAGNN(W)              | -534.63      | 51.46    | 0.015    | -1037.82     | 302.79   | 0.002   | -947.34      | 87.36    | 0.004   | -1427.31     | 73.32    | 0.000   |
| 74-112        | (M) DSVRSSKIGLFRPDNFIHGNSGAGNNWAKG HYTEGAEL(I) | -1424.07     | 188.21   | 0.003    | -2231.42     | 94.12    | 0.000   | -2096.93     | 84.23    | 0.001   | -2642.13     | 109.72   | 0.000   |
| 113-118       | (L) IENVMD(V)                                  | -119.85      | 21.9     | 0.018    | -53.14       | 30.32    | 0.210   | -796.4       | 21.78    | 0.000   | -509.14      | 23.4     | 0.000   |
| 133-150       | (G) FQLIHLGGGTGSGMGL(L)                        | -660.4       | 85.16    | 0.000    | -893.54      | 251.16   | 0.000   | -256.46      | 134.35   | 0.075   | -496.46      | 165.92   | 0.460   |
| 152-166       | (L) INKIREEYPDRIMNT(F)                         | -341.77      | 22.56    | 0.001    | -319.25      | 33.31    | 0.003   | -204.97      | 34.03    | 0.006   | -206.69      | 39.84    | 0.029   |
| 168-187       | (F) SVVPSPKVSDTVVEPYNAIL(S)                    | 478.29       | 212.67   | 0.021    | 222.41       | 52.8     | 0.280   | 199.32       | 44.21    | 0.360   | 154.03       | 26       | 0.470   |
| 188-199       | (L) SIHQIENDET(F)                              | -539.33      | 77.99    | 0.001    | -281.41      | 48.63    | 0.033   | -543.72      | 81.95    | 0.003   | -738.29      | 46.74    | 0.001   |
| 202-207       | (C) IDNEAL(Y)                                  | -23.26       | 17.25    | 0.290    | -11.28       | 5.15     | 0.420   | -3.19        | 8.11     | 0.850   | 4.67         | 14.02    | 0.820   |
| 208-212       | (L) YDICF(R)                                   | -345.35      | 29.94    | 0.000    | -328.1       | 54.05    | 0.000   | -316.39      | 10.25    | 0.001   | -332.16      | 16.06    | 0.000   |
| 212-230       | (C) FRTLKLTNPTYGDLNHLVS(L)                     | -1345.5      | 131.88   | 0.000    | -1369.29     | 138.72   | 0.000   | -1318.95     | 99.37    | 0.000   | -1407.96     | 190.52   | 0.000   |
| 231-246       | (S) LTMSGVTTSLRFPGQL(N)                        | -1136.9      | 153.86   | 0.014    | -1107.25     | 215.58   | 0.012   | -1221.33     | 317.1    | 0.007   | -1373.4      | 188.12   | 0.008   |
| 251-265       | (L) RKLAVNMVFPRLHF(F)                          | 486.17       | 102.04   | 0.023    | 389.47       | 113.55   | 0.046   | 409.92       | 128.29   | 0.028   | 449.9        | 25.17    | 0.045   |
| 266-280       | (F) FMPGFAPLTARGSQ(Y)                          | 36.89        | 12.71    | 0.003    | -264.92      | 45.45    | 0.007   | -332.95      | 22.34    | 0.001   | -427.65      | 88.76    | 0.007   |
| 281-293       | (Q) YRALSVPELTQQM(F)                           | -400.52      | 56.04    | 0.007    | -600.72      | 17.11    | 0.003   | -1766.35     | 78.12    | 0.000   | -2214.04     | 94.23    | 0.000   |
| 301-313       | (M) AACDPRRGRYLT(A)                            | -865.29      | 72.89    | 0.000    | -604.77      | 43.42    | 0.000   | -2152.03     | 34.9     | 0.000   | -1882.09     | 149.05   | 0.000   |
| 316-323       | (C) IFRGRMST(R)                                | -255.33      | 102.93   | 0.026    | -375.1       | 77.82    | 0.009   | -250.64      | 44.47    | 0.007   | -301.79      | 47.25    | 0.005   |
| 331-340       | (L) LSVQTKNSSY(F)                              | -519.93      | 80.93    | 0.013    | -562.59      | 67.87    | 0.006   | -1748.22     | 84.81    | 0.000   | -1702.27     | 35.69    | 0.000   |
| 341-353       | (Y) FVEWIPNNVAV(C)                             | -1283.58     | 59.18    | 0.002    | -978.4       | 294.94   | 0.002   | -1962.03     | 209.65   | 0.001   | -2027.09     | 133.15   | 0.001   |
| 435-446       | (D) VEEYEEAEASPEKET(M)                         | -136.52      | 34.94    | 0.015    | -303.54      | 126.28   | 0.022   | -215.04      | 11.12    | 0.000   | -427.47      | 68.3     | 0.001   |

\* Highlighted in pink are P values for peptides significantly protected from deuterium incorporation, with P<0.01; in blue, P<0.05; in light blue are residues with  $\Delta$ HDX values slightly outside the assigned significance, with 0.05<P<0.09; and in green are the P values for peptides significantly deprotected, with P<0.05.

**Table S3.** Summary of computational docking simulations for MSAs in native (wild-type) and mutated tubulin. (a) The binding energies ( $\Delta G_{\text{bind}}$ ) for each drug in the corresponding site are in kcal/mol (at 298 K). (b) For every drug, the difference between the binding energy for each site and for the taxane site of native tubulin is shown. The differences that are greater than 1 unit are highlighted in bold, as they represent the more significant changes in binding affinities.

| <b>(a) Computational Binding Energies (<math>\Delta G_{\text{bind}}</math>)</b> |                                   |             |             |             |             |             |             |                 |                  |             |             |             |                 |                           |             |                  |                   |
|---------------------------------------------------------------------------------|-----------------------------------|-------------|-------------|-------------|-------------|-------------|-------------|-----------------|------------------|-------------|-------------|-------------|-----------------|---------------------------|-------------|------------------|-------------------|
| Tubulin Source                                                                  | Chicken Erythrocyte Tubulin (CET) |             |             |             |             |             |             |                 |                  |             |             |             |                 | Bovine Brain Tubulin(BBT) |             |                  |                   |
|                                                                                 | Binding Site                      | Taxane site |             |             |             |             |             |                 | Alternative site |             |             |             |                 | $\alpha$ -tubulin         | Taxane site | Alternative site | $\alpha$ -tubulin |
| Drug/Mutation                                                                   | Native                            | F270V       | L231A       | A275S       | A275SL231A  | A296SA275S  | A296SL231A  | A296SA275SL231A | Native           | A296S       | A296SA275S  | A296SL231A  | A296SA275SL231A | Native                    | Taxane site | Alternative site | $\alpha$ -tubulin |
| EpoB average                                                                    | -11.34                            | -11.64      | -10.54      | -10.2       | -10.42      | -10.5       | -10.57      | -10.64          | -9.11            | -9.19       | -9.13       | -9.12       | -8.32           | -8.12                     |             |                  |                   |
| EpoB most common                                                                | -11.3                             | -11.5       | -10.6       | -10.3       | -10.65      | -10.5       | -10.7       | -10.55          | -9.25            | -9.25       | -9.25       | -9.22       | -7.8            | -8.15                     |             |                  |                   |
| EpoB minimum                                                                    | -11.59                            | -11.95      | -10.82      | -10.52      | -10.77      | -10.58      | -10.77      | -10.76          | -9.32            | -9.33       | -9.29       | -9.34       | -9.08           | -8.45                     |             |                  |                   |
| lxa average                                                                     | -11.88                            | -11.44      | -11.87      | -10.59      | -11.71      | -10.48      | -11.72      | -12.09          | -9.85            | -9.77       | -9.02       | -9.8        | -8.58           | -9.19                     |             |                  |                   |
| lxa most common                                                                 | -11.8                             | -11.15      | -11.9       | -10.65      | -11.8       | -10.55      | -11.8       | -12             | -9.8             | -9.8        | -9.05       | -9.8        | -8.5            | -9.25                     |             |                  |                   |
| lxa minimum                                                                     | -12.04                            | -11.94      | -11.95      | -10.91      | -11.85      | -10.85      | -11.82      | -12.1           | -9.94            | -9.89       | -9.09       | -9.89       | -8.88           | -9.58                     |             |                  |                   |
| LML average                                                                     | -9.52                             | -9.65       | -9.41       | -8.49       | -9.21       | -8.34       | -9.03       | -9.13           | -7.49            | -7.88       | -7.71       | -7.89       | -7.95           | -7.14                     | -8.62       | -9.99            | -7.2              |
| LML most common                                                                 | -9.65                             | -9.8        | -9.45       | -8.65       | -9.3        | -8.3        | -9.15       | -9.55           | -7               | -7.5        | -7.4        | -7.8        | -7.8            | -7.35                     | -8.9        | -10              | -7.4              |
| LML minimum                                                                     | -9.95                             | -10.09      | -9.51       | -8.85       | -9.38       | -8.55       | -9.29       | -9.6            | -7.83            | -8.32       | -8.49       | -8.26       | -7.99           | -7.38                     | -9.08       | -10.18           | -7.62             |
| PeIA average                                                                    | -9.52                             | -9.74       | -9.05       | -9.09       | -8.65       | -9.24       | -8.84       | -8.76           | -9.68            | -8.82       | -9.12       | -8.65       | -8.76           | -7.29                     | -8.62       | -8.45            | -5.92             |
| PeIA most common                                                                | -9.45                             | -9.8        | -9.2        | -9.1        | -8.4        | -9.3        | -8.85       | -8.6            | -9.65            | -8.65       | -9.3        | -8.75       | -8.65           | -7.4                      | -8.7        | -8.3             | -5.9              |
| PeIA minimum                                                                    | -9.88                             | -10.14      | -9.34       | -9.28       | -8.81       | -9.48       | -9.25       | -8.94           | -9.79            | -9.02       | -9.84       | -9.54       | -8.99           | -7.59                     | -9.1        | -9.04            | -6.54             |
| Taxol average                                                                   | -13.54                            | -11.43      | -11.96      | -12.73      | -11.83      | -12.69      | -11.81      | -11.96          | -8.7             | -8.59       | -8.8        | -8.48       | -8.37           | -8.38                     |             |                  |                   |
| Taxol most common                                                               | -13.8                             | -11.95      | -12.55      | -12.5       | -12.3       | -13.35      | -11.85      | -11.7           | -8.15            | -8.85       | -8.4        | -8.25       | -8.05           | -8.8                      |             |                  |                   |
| Taxol minimum                                                                   | -14.07                            | -12.24      | -12.6       | -12.94      | -12.45      | -13.47      | -12.98      | -12.14          | -9.79            | -9.7        | -9.74       | -9.44       | -9.14           | -8.85                     |             |                  |                   |
| <b>(b) Differences from native Taxane site energy</b>                           |                                   |             |             |             |             |             |             |                 |                  |             |             |             |                 |                           |             |                  |                   |
| EpoB average                                                                    | 0                                 | -0.3        | 0.8         | <b>1.14</b> | 0.92        | 0.84        | 0.77        | 0.7             | <b>2.23</b>      | <b>2.15</b> | <b>2.21</b> | <b>2.22</b> | <b>3.02</b>     | <b>3.22</b>               |             |                  |                   |
| EpoB most common                                                                | 0                                 | -0.2        | 0.7         | <b>1</b>    | 0.65        | 0.8         | 0.6         | 0.75            | <b>2.05</b>      | <b>2.05</b> | <b>2.05</b> | <b>2.08</b> | <b>3.5</b>      | <b>3.15</b>               |             |                  |                   |
| EpoB minimum                                                                    | 0                                 | -0.36       | 0.77        | <b>1.07</b> | 0.82        | <b>1.01</b> | 0.82        | 0.83            | <b>2.27</b>      | <b>2.26</b> | <b>2.3</b>  | <b>2.25</b> | <b>2.51</b>     | <b>3.14</b>               |             |                  |                   |
| lxa average                                                                     | 0                                 | 0.44        | 0.01        | <b>1.29</b> | 0.17        | <b>1.4</b>  | 0.16        | -0.21           | <b>2.03</b>      | <b>2.11</b> | <b>2.86</b> | <b>2.08</b> | <b>3.3</b>      | <b>2.69</b>               |             |                  |                   |
| lxa most common                                                                 | 0                                 | 0.65        | -0.1        | <b>1.15</b> | 0           | <b>1.25</b> | 0           | -0.2            | <b>2</b>         | <b>2</b>    | <b>2.75</b> | <b>2</b>    | <b>3.3</b>      | <b>2.55</b>               |             |                  |                   |
| lxa minimum                                                                     | 0                                 | 0.1         | 0.09        | <b>1.13</b> | 0.19        | <b>1.19</b> | 0.22        | -0.06           | <b>2.1</b>       | <b>2.15</b> | <b>2.95</b> | <b>2.15</b> | <b>3.16</b>     | <b>2.46</b>               |             |                  |                   |
| LML average                                                                     | 0                                 | -0.13       | 0.11        | <b>1.03</b> | 0.31        | <b>1.18</b> | 0.49        | 0.39            | <b>2.03</b>      | <b>1.64</b> | <b>1.81</b> | <b>1.63</b> | <b>1.57</b>     | <b>2.38</b>               | 0           | <b>-1.37</b>     | <b>1.42</b>       |
| LML most common                                                                 | 0                                 | -0.15       | 0.2         | <b>1</b>    | 0.35        | <b>1.35</b> | 0.5         | 0.1             | <b>2.65</b>      | <b>2.15</b> | <b>2.25</b> | <b>1.85</b> | <b>1.85</b>     | <b>2.3</b>                | 0           | <b>-1.1</b>      | <b>1.5</b>        |
| LML minimum                                                                     | 0                                 | -0.14       | 0.44        | <b>1.1</b>  | 0.57        | <b>1.4</b>  | 0.66        | 0.35            | <b>2.12</b>      | <b>1.63</b> | <b>1.46</b> | <b>1.69</b> | <b>1.96</b>     | <b>2.57</b>               | 0           | <b>-1.1</b>      | <b>1.46</b>       |
| PeIA average                                                                    | 0                                 | -0.22       | 0.47        | 0.43        | 0.87        | 0.28        | 0.68        | 0.76            | -0.16            | 0.7         | 0.4         | 0.87        | 0.76            | <b>2.23</b>               | 0           | 0.17             | <b>2.7</b>        |
| PeIA most common                                                                | 0                                 | -0.35       | 0.25        | 0.35        | <b>1.05</b> | 0.15        | 0.6         | 0.85            | -0.2             | 0.8         | 0.15        | 0.7         | 0.8             | <b>2.05</b>               | 0           | 0.4              | <b>2.8</b>        |
| PeIA minimum                                                                    | 0                                 | -0.26       | 0.54        | 0.6         | <b>1.07</b> | 0.4         | 0.63        | 0.94            | 0.09             | 0.86        | 0.04        | 0.34        | 0.89            | <b>2.29</b>               | 0           | 0.06             | <b>2.56</b>       |
| Taxol average                                                                   | 0                                 | <b>2.11</b> | <b>1.58</b> | 0.81        | <b>1.71</b> | 0.85        | <b>1.73</b> | <b>1.58</b>     | <b>4.84</b>      | <b>4.95</b> | <b>4.74</b> | <b>5.06</b> | <b>5.17</b>     | <b>5.16</b>               |             |                  |                   |
| Taxol most common                                                               | 0                                 | <b>1.85</b> | <b>1.25</b> | <b>1.3</b>  | <b>1.5</b>  | 0.45        | <b>1.95</b> | <b>2.1</b>      | <b>5.65</b>      | <b>4.95</b> | <b>5.4</b>  | <b>5.55</b> | <b>5.75</b>     | <b>5</b>                  |             |                  |                   |
| Taxol minimum                                                                   | 0                                 | <b>1.83</b> | <b>1.47</b> | <b>1.13</b> | <b>1.62</b> | 0.6         | <b>1.09</b> | <b>1.93</b>     | <b>4.28</b>      | <b>4.37</b> | <b>4.33</b> | <b>4.63</b> | <b>4.93</b>     | <b>5.22</b>               |             |                  |                   |

**Table S4.** Effect of amino acid composition in the binding sites on the  $\Delta G_{\text{bind}}$  of laulimalide.

|                                         | Mean Binding Energies ( $\Delta G_{\text{bind}}$ ) at 298 K (kcal/mol) |       |       |             |               |
|-----------------------------------------|------------------------------------------------------------------------|-------|-------|-------------|---------------|
|                                         | Wild Type CET                                                          | A275S | A296S | A275S/A296S | Wild Type BBT |
| Alternative Site                        | -7.49                                                                  | -     | -7.88 | -8.34       | -9.99         |
| Taxane Site                             | -9.52                                                                  | -8.49 | -     | -7.71       | -8.62         |
| $\Delta\Delta G_{\text{bind}}$ (Alt-Tx) | 2.03                                                                   | -     | -     | -0.63       | -1.37         |

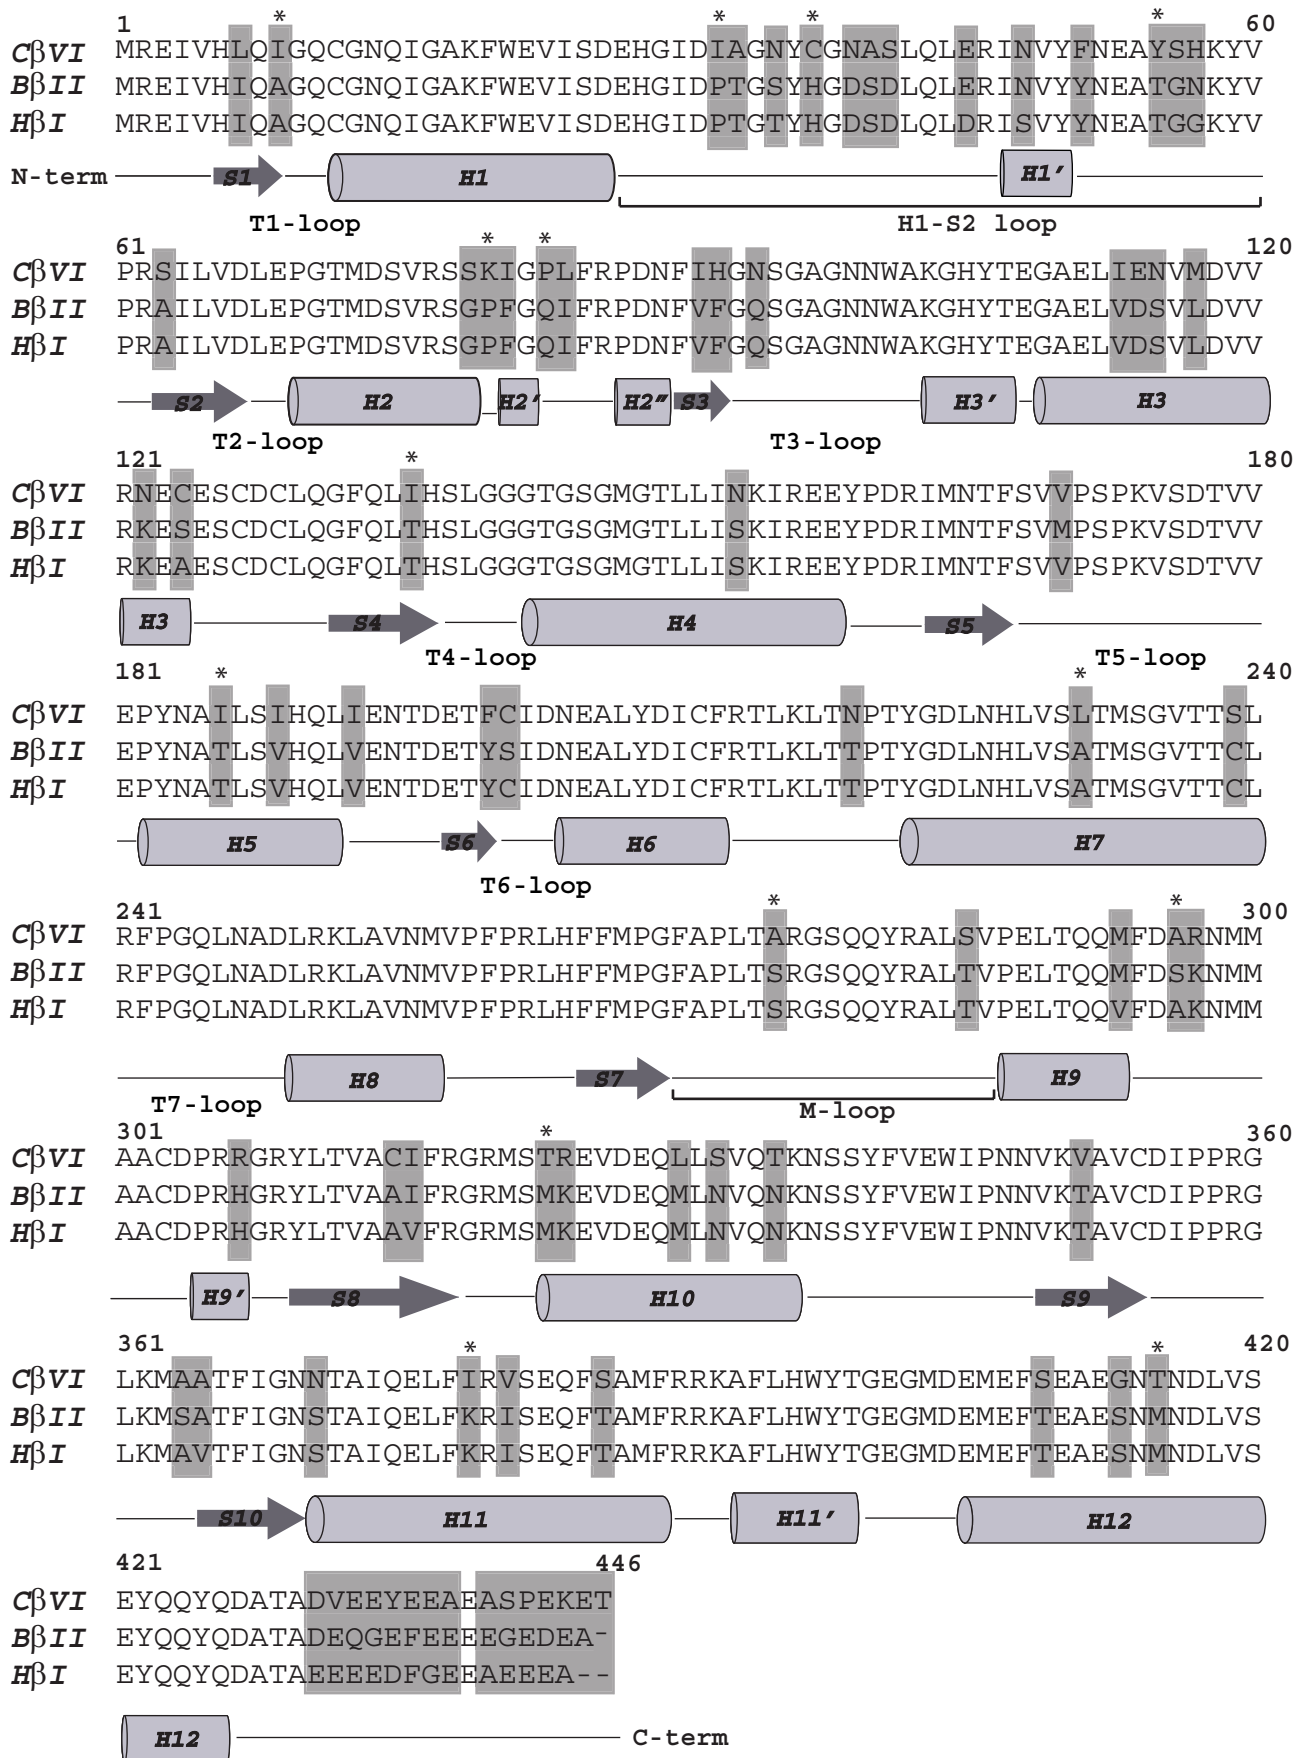

Figure S1



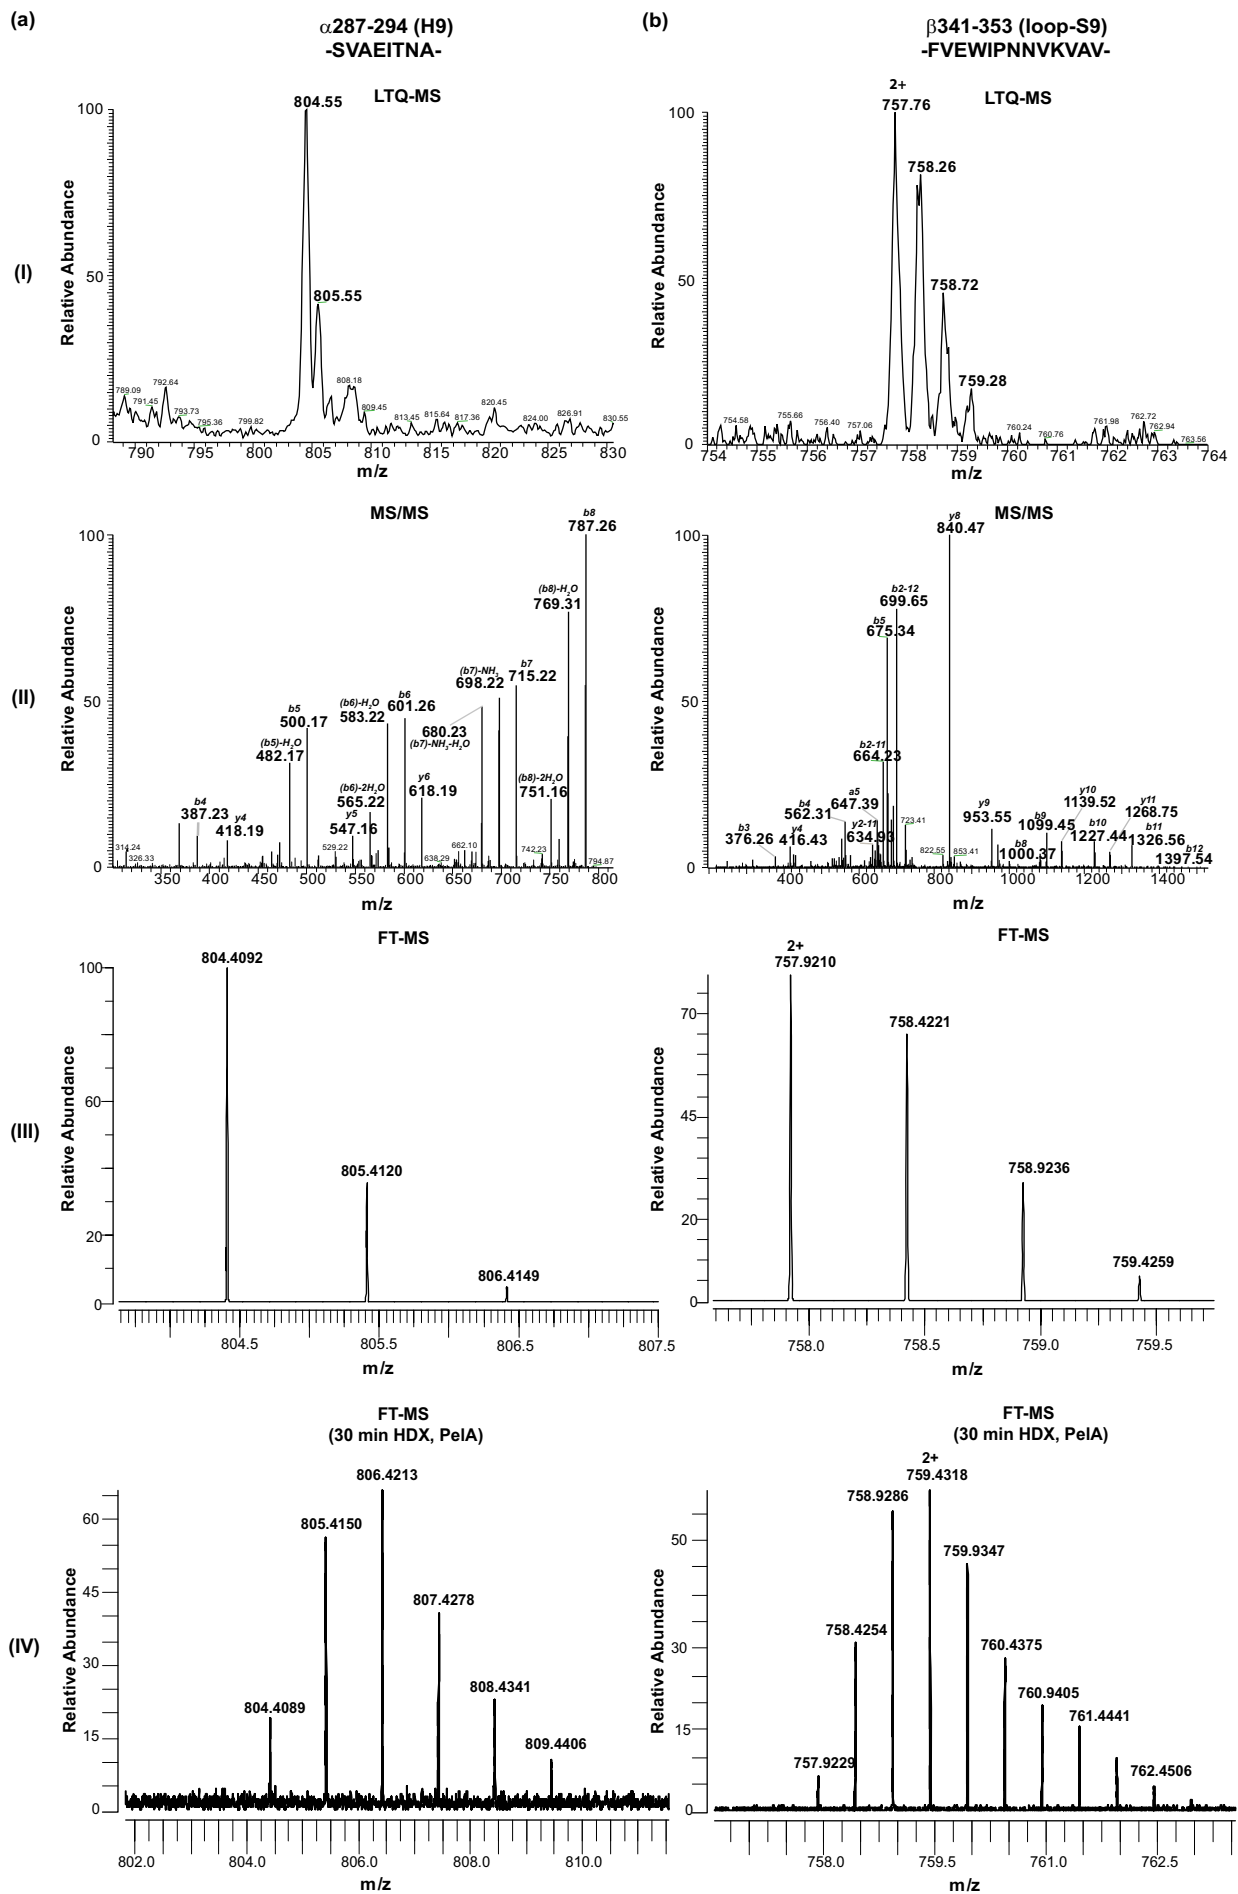

Figure S2

$\alpha$ -TUB MRECISVHVGQAGVQIGNACWELYCLEHGIQPDGQMP SDKTIGGGDDSFNTFFSETGAGK  
10 20 30 40 50 60  
 $\beta$ -TUB MREIVHLQIGQCGNQIGAKFWEVISDEHGIDIAGNYCGNASLQLERINVFNEAYSHKYV

$\alpha$ -TUB QPDGQMP SDKTIGGGDDSFNTFFSETGAGKQLITGKEDAANNYARGHYTIGKEIIDLVLD  
70 80 90 100 110 120  
 $\beta$ -TUB PRSILVDLEPGTMSVRSSKIGPLFRPDNF IHGNSGAGNNWAKGHYTEGAELIENVMDVV

$\alpha$ -TUB RIRKLADQCTGLQGF SVFHSFGGGTGS GFTSLLMERLSVDY GKKSKLEFSIYPARQVSTA  
130 140 150 160 170 180  
 $\beta$ -TUB RNECESDCLOQFQLIHSLGGGTGSGMGTLLINKIREEYPDRIMNTFSVVPSPKVS DTVV

$\alpha$ -TUB VVEPYN SILTHTTTLEHSDCAF MVDNEAIYD ICRRNLDIERPTYTNLNR LIGQIVSSITA  
190 200 210 220 230 240  
 $\beta$ -TUB EPYNAILS IHQLIENTDETFCIDNEALYD ICFRTLKLTNP TYGDLNHLVSLTMSGVT TSL

$\alpha$ -TUB SLRFDGALNVDL TEFQTNLVPYPR IHFPLATYAPVISA EKAYHEQLSVAEITNACFEPAN  
250 260 270 280 290 300  
 $\beta$ -TUB RFPGQLNADLRKLAVNMVFP PRLHFFMPGFAPLTAR GSQQYRALSVPELTQQMFDARNMM

$\alpha$ -TUB QMVKCDPRHGKYMACCLLYRGDVVPKDVNA AAIATIKTKRTIQFVDWCPTGFKVG INYQPP  
310 320 330 340 350 360  
 $\beta$ -TUB AACDPRRGRYLTVACIFRGRMSTREVDEQLLSVQTKNSSYFVEWI PNNVKVAVCDIPPRG

$\alpha$ -TUB TVVPGGDLAKVQRAVCMLSNTT AIAEAWARLDHKFDLMYAKRAFVHWYV GEGMEEGEFSE  
370 380 390 400 410 420  
 $\beta$ -TUB LKMAATFIGNNTAIQELFIRVSEQFSAMFR RKAFLHWYTGE GMDMEFSEAEGNTNDLVS

$\alpha$ -TUB AREDMAALEKDYEEVGVDSVEGEGEEEGEE  
430 440 450  
 $\beta$ -TUB EYQQYQDATADVEEYEEAEASPEKET

Figure S3

$\alpha$ -287-294 (H9)  
-SVAEITNA-

(a)

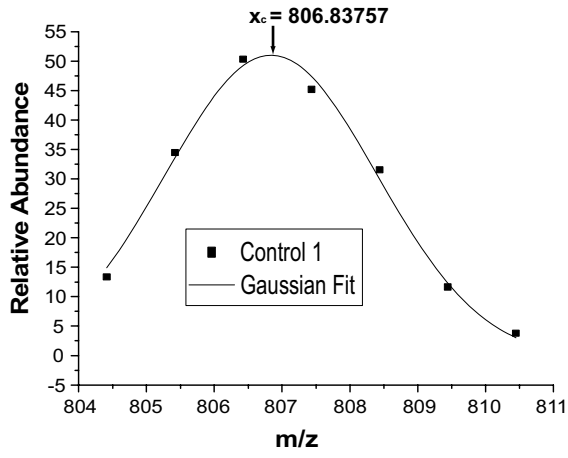

(b)

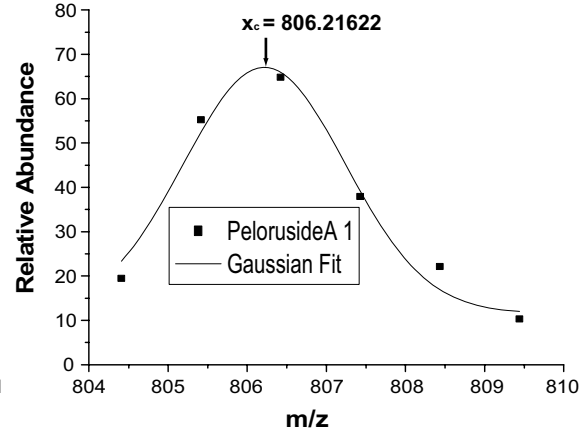

Figure S4

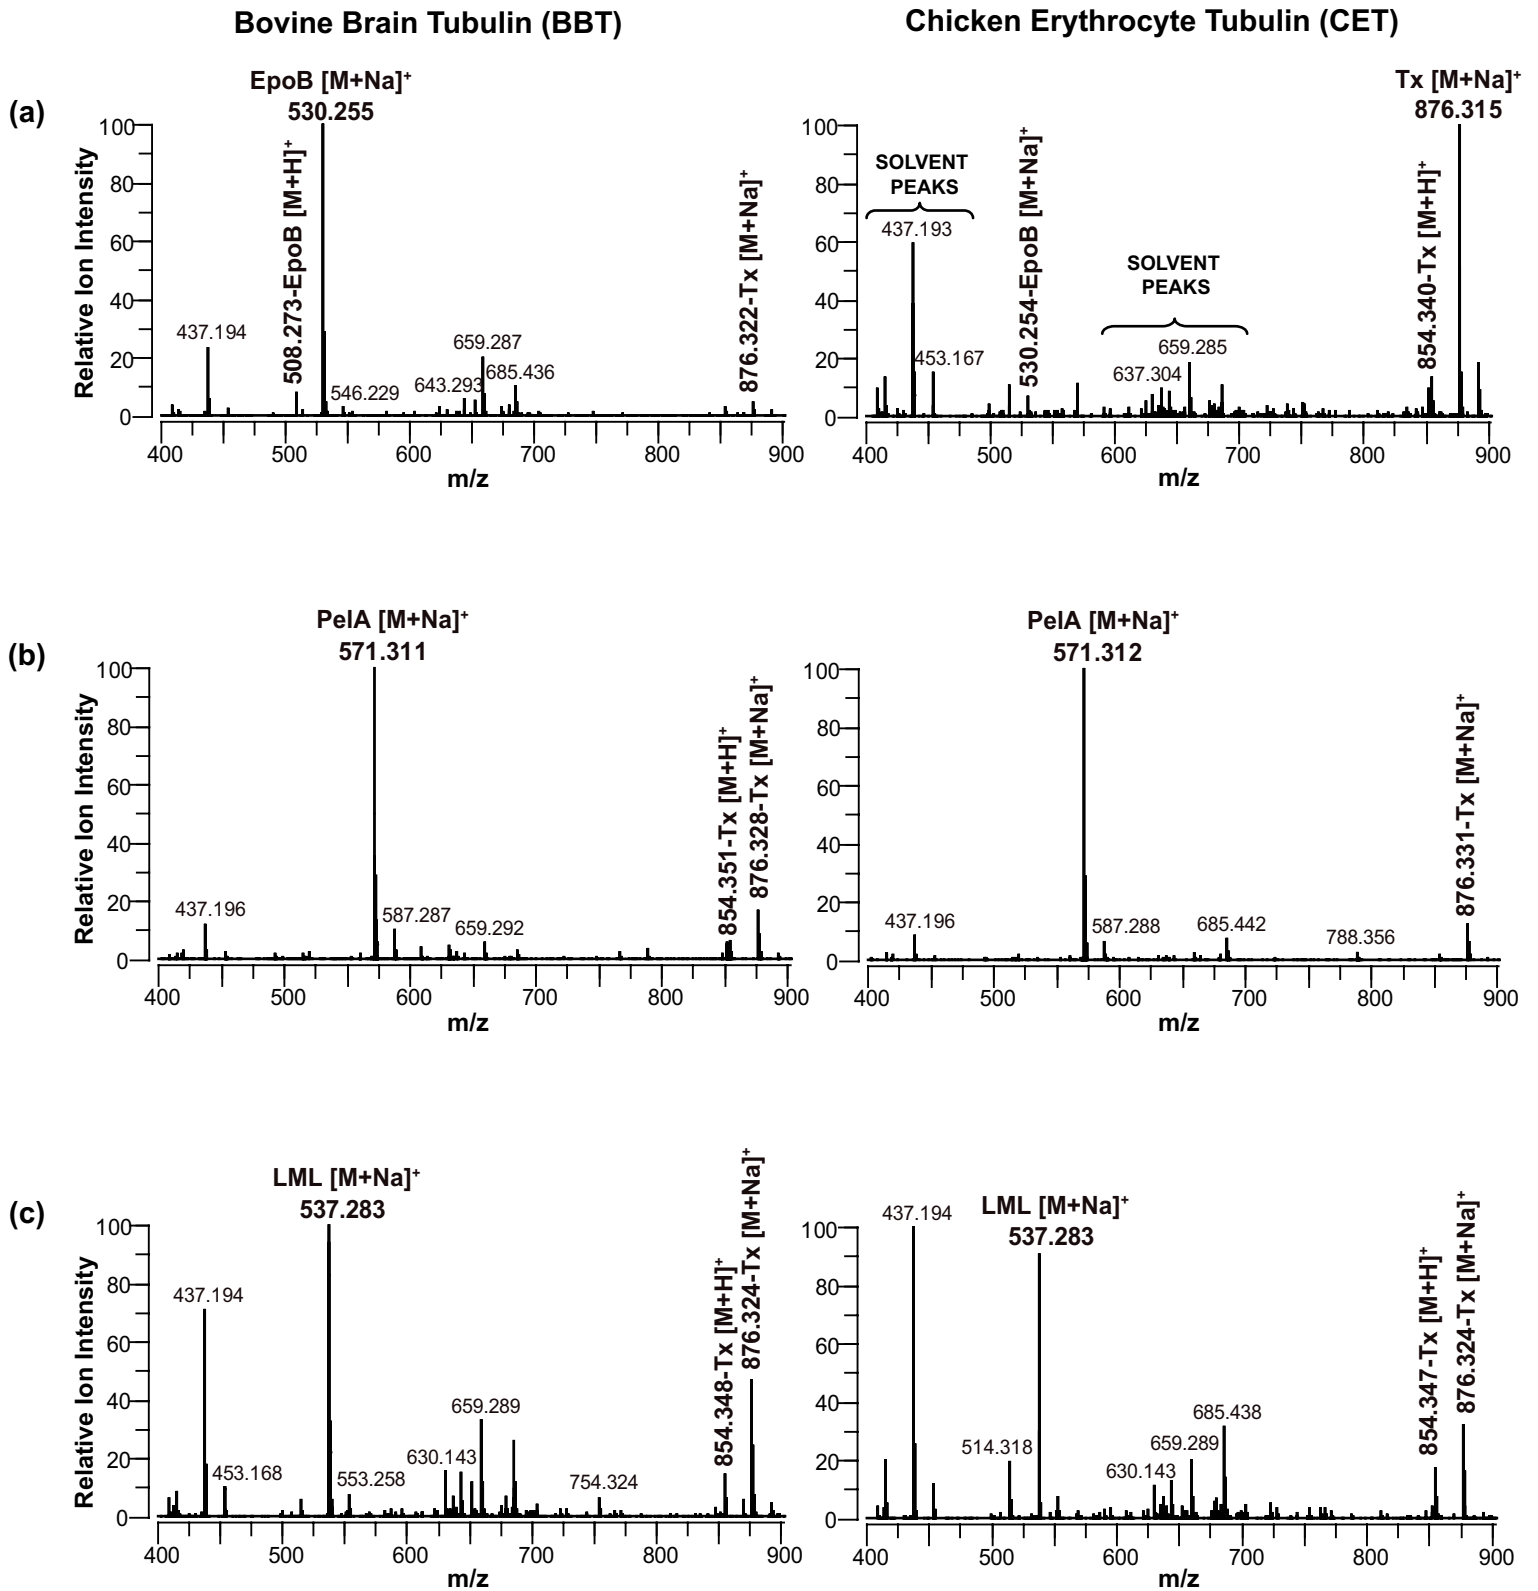

Figure S5

(a)

| $\Delta G_{\text{bind}}$ at 298 K (kcal/mol) |           |        |
|----------------------------------------------|-----------|--------|
|                                              | Wild Type | F270V  |
| Epothilone B                                 | -11.34    | -11.64 |
| Ixabepilone                                  | -11.88    | -11.44 |

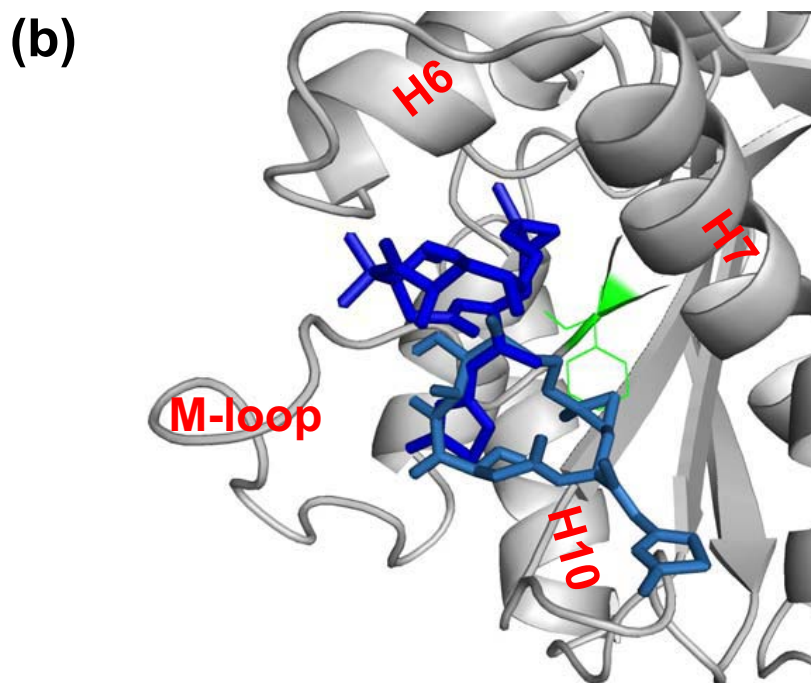

Figure S6
